# Supplementary material
Source: HighWire-hosted journal article supplement (https://www.jneurosci.org/highwire/filestream/600554/field_highwire_adjunct_files/0/Supplemental_Material.pdf)
Supplement: Supplemental_Material.pdf [file Supplemental_Material.pdf]

Supplementary Fig. 1

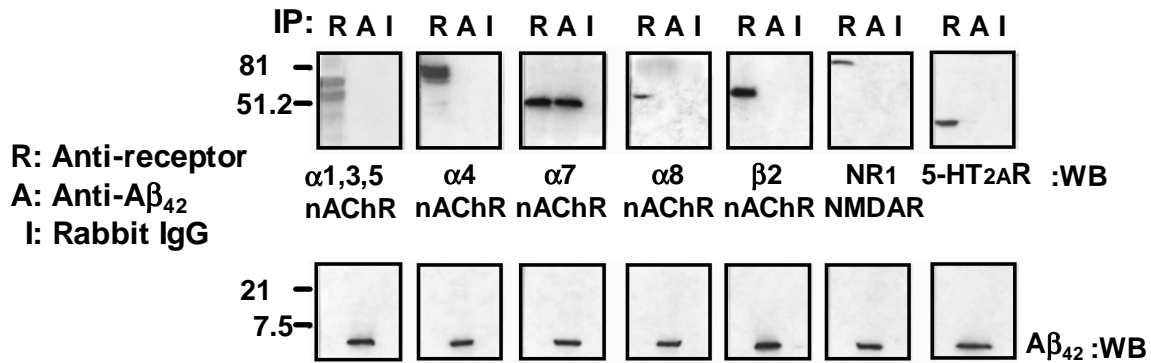

**A $\beta_{42}$  interacts selectively with the  $\alpha 7$ nAChRs.** Using synaptosomes prepared from rat frontal cortices, the selectivity of A $\beta_{42}$ - $\alpha 7$ nAChR interaction was determined by comparing anti-receptor immunoprecipitates (**R**) of the Krebs'-Ringer incubated synaptosomal lysate to anti-A $\beta_{42}$  immunoprecipitates (**A**) of the A $\beta_{42}$ -incubated synaptosomal lysate with pre-immune rabbit IgG (**I**) as a control. Western blots using specific antibodies directed against the indicated receptors reveals that A $\beta_{42}$  selectively associated with the  $\alpha 7$ nAChRs. The selective A $\beta_{42}$ - $\alpha 7$ nAChR association shown here is consistent with the result from our previous studies (Wang et al., 2000a, b). The blots shown are the representative of 3 individual determinations from frontal cortex of one rat.

Supplementary Fig. 2

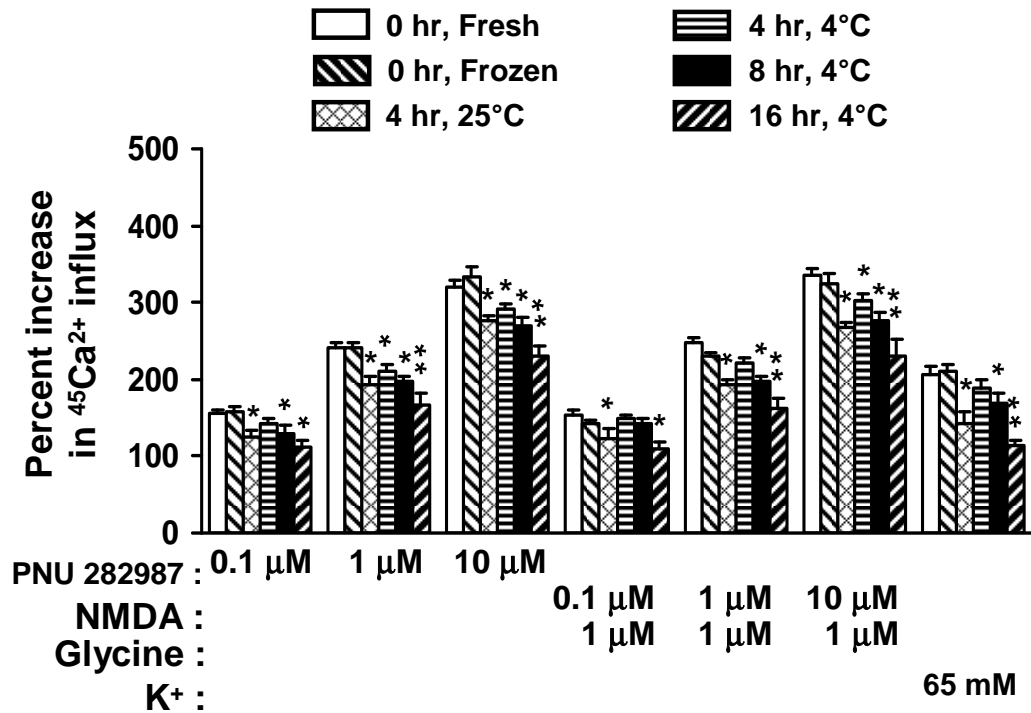

**Rat frontal cortex with postmortem delays retains  $\alpha 7$ nAChR, NMDAR and voltage-gated  $\text{Ca}^{2+}$  channel responsiveness measured by stimulation-induced  $\text{Ca}^{2+}$  influx.** To simulate postmortem delays, rats were sacrificed and placed at 25°C for 4-hr or 4°C for 0, 4, 8 or 16 hr. At the indicated time, brains were removed and frontal cortices were dissected, frozen immediately on dry ice and stored at -80°C for 1 week. For comparison, fresh rat brain frontal cortices (fresh 0 hr) were obtained. Synaptosomes (50  $\mu\text{g}$ ) prepared from these tissues were used to assess  $\alpha 7$ nAChR, NMDAR and voltage-gated  $\text{Ca}^{2+}$  channel function respectively by  $\text{Ca}^{2+}$  influx in response to 5-min 0.1-10  $\mu\text{M}$  PNU 282987, 5-min 0.1 - 10  $\mu\text{M}$  NMDA/ 1  $\mu\text{M}$  glycine and 1-min 65 min  $\text{K}^{+}$ -depolarization. Basal, non-stimulated  $\text{Ca}^{2+}$  influx levels in synaptosomes from fresh 0 hr, frozen 0 hr, 25°C 4 hr, 4°C 4 hr, 4°C 8 hr, 4°C 16 hr were  $5660.4 \pm 321.9$ ,  $5060.2 \pm 218.3$ ,  $2285.3 \pm 140.1$ ,  $3600.3 \pm 150.6$ ,  $3194.6 \pm 157.2$  and  $2648.8 \pm 145.3$  cpm, respectively. In addition, stimulation-induced  $\text{Ca}^{2+}$  influx through  $\alpha 7$ nAChRs, NMDARs and voltage-gated  $\text{Ca}^{2+}$  channels measured by PNU 282987 and NMDA/glycine dose-dependency and  $\text{K}^{+}$ -depolarization responsiveness in synaptosomes are relatively stable measures in relation to the postmortem intervals. Data are expressed as means  $\pm$  s.e.m of the % stimulation above basal  $^{45}\text{Ca}^{2+}$  levels in cpm of 5 independent determinations each used an individual rat brain. \* $p < 0.05$ , \*\* $p < 0.01$  compared to fresh 0 hr induced by a specific dose of stimulus (One-factor ANOVA followed by Newman-Keuls multiple comparisons).

Supplementary Fig. 3

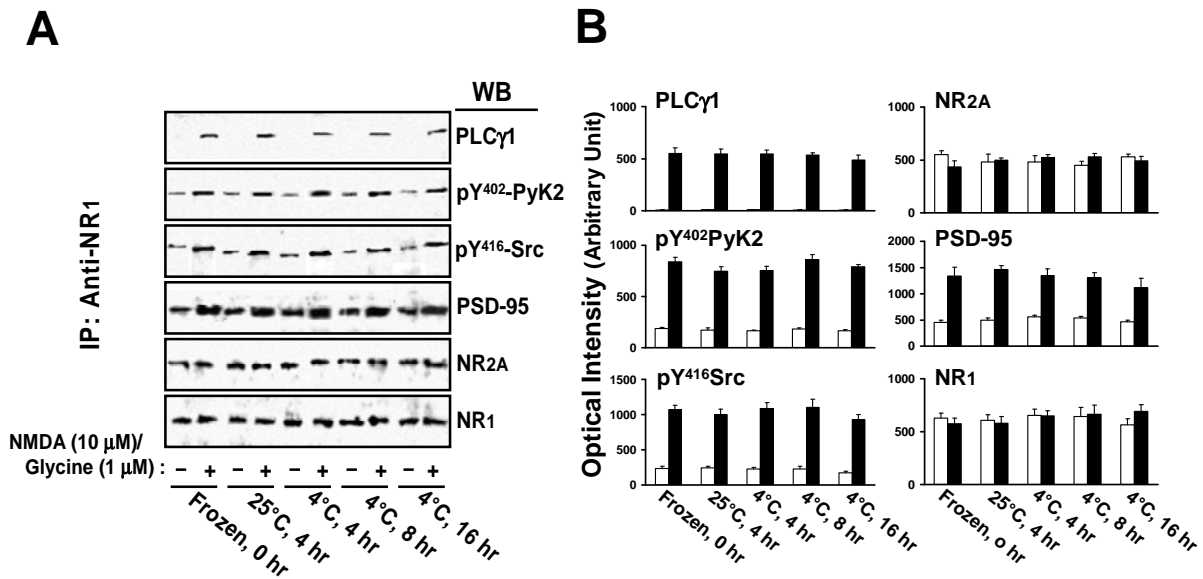

**Rat frontal cortex with postmortem delays maintains stable NMDAR signaling, NMDAR – PSD-95 coupling and assembly integrity.** To simulate postmortem delays, rats were sacrificed and placed at 25°C for 4 hr or 4°C for 0, 4, 8 or 16 hr. At the indicated time, brains were removed and frontal cortices dissected, frozen immediately on dry ice and stored at -80°C for 1 week. After slowly thawing, frontal cortical slices were used to assess the effect of postmortem delay on NMDAR signaling, NMDAR – PSD-95 interaction and NMDAR assemblies following incubation with either Krebs's-Ringer or 10 μM NMDA/1 μM glycine for 30 min. The levels of PLCγ1, pY<sup>402</sup>PyK2, pY<sup>416</sup>Src, PSD-95 together with NR2A and NR1 in the anti-NR1 immunoprecipitate from frontal cortical slice lysates were determined by Western blotting (**A**) and quantified using densitometric scanning (**B**). Although PLCγ1 recruitment under non-stimulated basal condition was essentially undetectable, NMDA/glycine-stimulated PLCγ1 were similar among 5 time points. The NMDA/glycine-induced PyK2 and Src activation, measured by the ratio of NMDA/glycine-induced pY<sup>402</sup>PyK2, pY<sup>416</sup>Src and PSD-95 association did not differ, with respect to its basal level, at any time point ( $p = 0.25$ ). Similarly, NR1 and NR2A levels were comparable among all 5 time points with or without NMDA/glycine stimulation. Data are expressed as means  $\pm$  s.e.m. of the optical intensity in arbitrary units derived from 4 independent determinations from an individual rat brain. There was no statistical difference at any time points for any parameter examined (ANOVA).

Supplementary Fig. 4

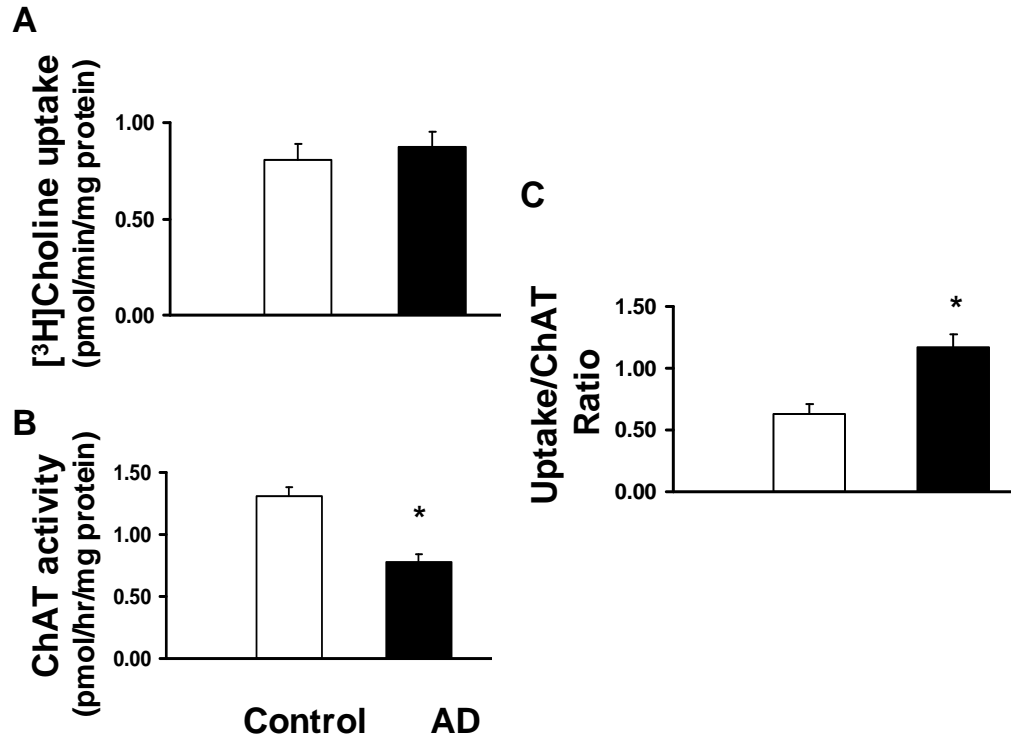

**Reduced acetylcholine synthesis with normal high-affinity choline uptake in synaptosomes of postmortem frontal cortices from AD subjects.** Synaptosomes prepared from frontal cortices of 11 control/AD pairs were used to assess active high-affinity choline uptake (A) and ChAT activity (B) by incubating with 0.1  $\mu$ M [ $^3$ H]choline containing Kreb's-Ringer for 5 and 30 min, respectively. The level of high-affinity choline uptake per active cholinergic nerve terminal in frontal cortical synaptosomes was also estimated using the high-affinity choline uptake/ChAT activity ratio (C). A 40.6% reduction of ChAT activity with a 2-fold increase choline uptake per viable nerve terminal was detected in AD tissues. Data are expressed as means  $\pm$  s.e.m. of 11 pairs of frontal cortical synaptosomes from control and AD subjects. \*p < 0.01 comparing control to the best matched AD by two-tailed Student's *t* test.
